# Supplementary material
Source: MDPI journal article supplement (https://www.mdpi.com/2308-3417/8/1/1)
Supplement: s1 [file s1]

## Supplementary Materials

**Table S1.** *APOE4* allele frequency in different healthy ethnic populations.

| Sample Size | Title 2 | Title 3                       |
|-------------|---------|-------------------------------|
| 615         | 22.70%  | Finland [35]                  |
| 279         | 20.60%  | Sweden [36]                   |
| 466         | 17.40%  | Denmark [77] [78]             |
| 400         | 14.80%  | UK – Scotland [78]            |
| 159         | 13.70%  | UK - London [77] [78]         |
| 178         | 12.00%  | France – Lille [77] [78]      |
| 249         | 11.90%  | France – Reims [78]           |
| 303         | 11.60%  | France – Nancy [79]           |
| 159         | 10.70%  | France - Strasbourg [77] [78] |
| 171         | 8.20%   | France – Toulouse [77] [78]   |
| 173         | 10.70%  | Switzerland-Geneva [78]       |
| 100         | 10.00%  | Spain-Barcelona [77] [78]     |
| 186         | 6.10%   | Spain – Madrid [77] [78]      |
| 352         | 9.80%   | Italy-Padua [77] [78]         |
| 195         | 7.20%   | Italy-Rome [54] [78]          |
| 280         | 5.20%   | Sardinia [54]                 |
| 174         | 6.3%    | Sicily [56]                   |
| 335         | 7.0%    | Cyprus [80]                   |

**Table S2.** *APOE4* allele frequency in healthy individuals in various parts of Greece.

| Sample Size | Title 2 | Title 3                                   |
|-------------|---------|-------------------------------------------|
| 160         | 13.10%  | Northern Greece [41]                      |
| 555         | 13.00%  | North-western Greece [53]                 |
| 391         | 8.58%   | Central Greece [38]                       |
| 216         | 6.50%   | Athens [80]                               |
| 95          | 6.60%   | Athens-Southern Greece<br>(current study) |
